# Supplementary material for: Genetic analysis of the rice jasmonate receptors reveals specialized functions for OsCOI2
Source: PubMed Central journal article supplement (PMC10490909; doi:10.1371/journal.pone.0291385), 2023-09-08
Supplement: pone.0291385.s001.pdf [file pone.0291385.s001.pdf]

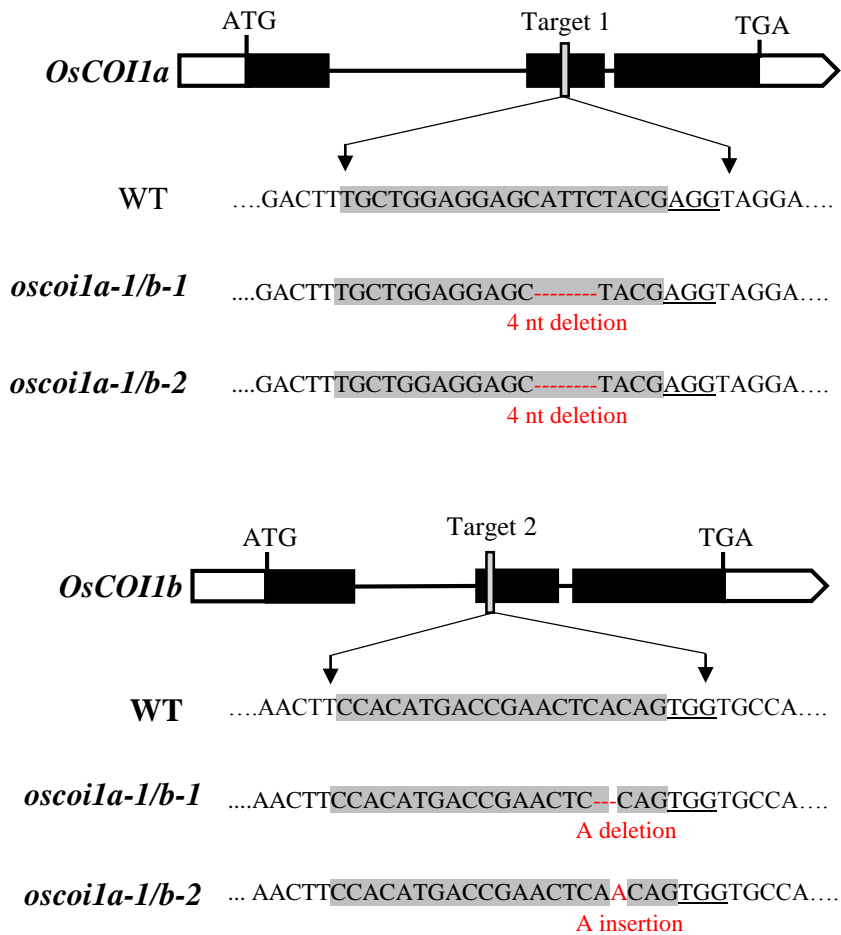

**Figure S1. Schematic representation of the *oscoila* double mutant lines.**

*OsCOIIa* and *OsCOIIb* gene structures and the CRISPR-Cas9 target sites are shown. The insertion and deletion sites of two allelic mutations (*oscoila-1/b-1*, *oscoila-1/b-2*) generated by two gRNAs are shown in comparison with the wild-type (WT) sequence.

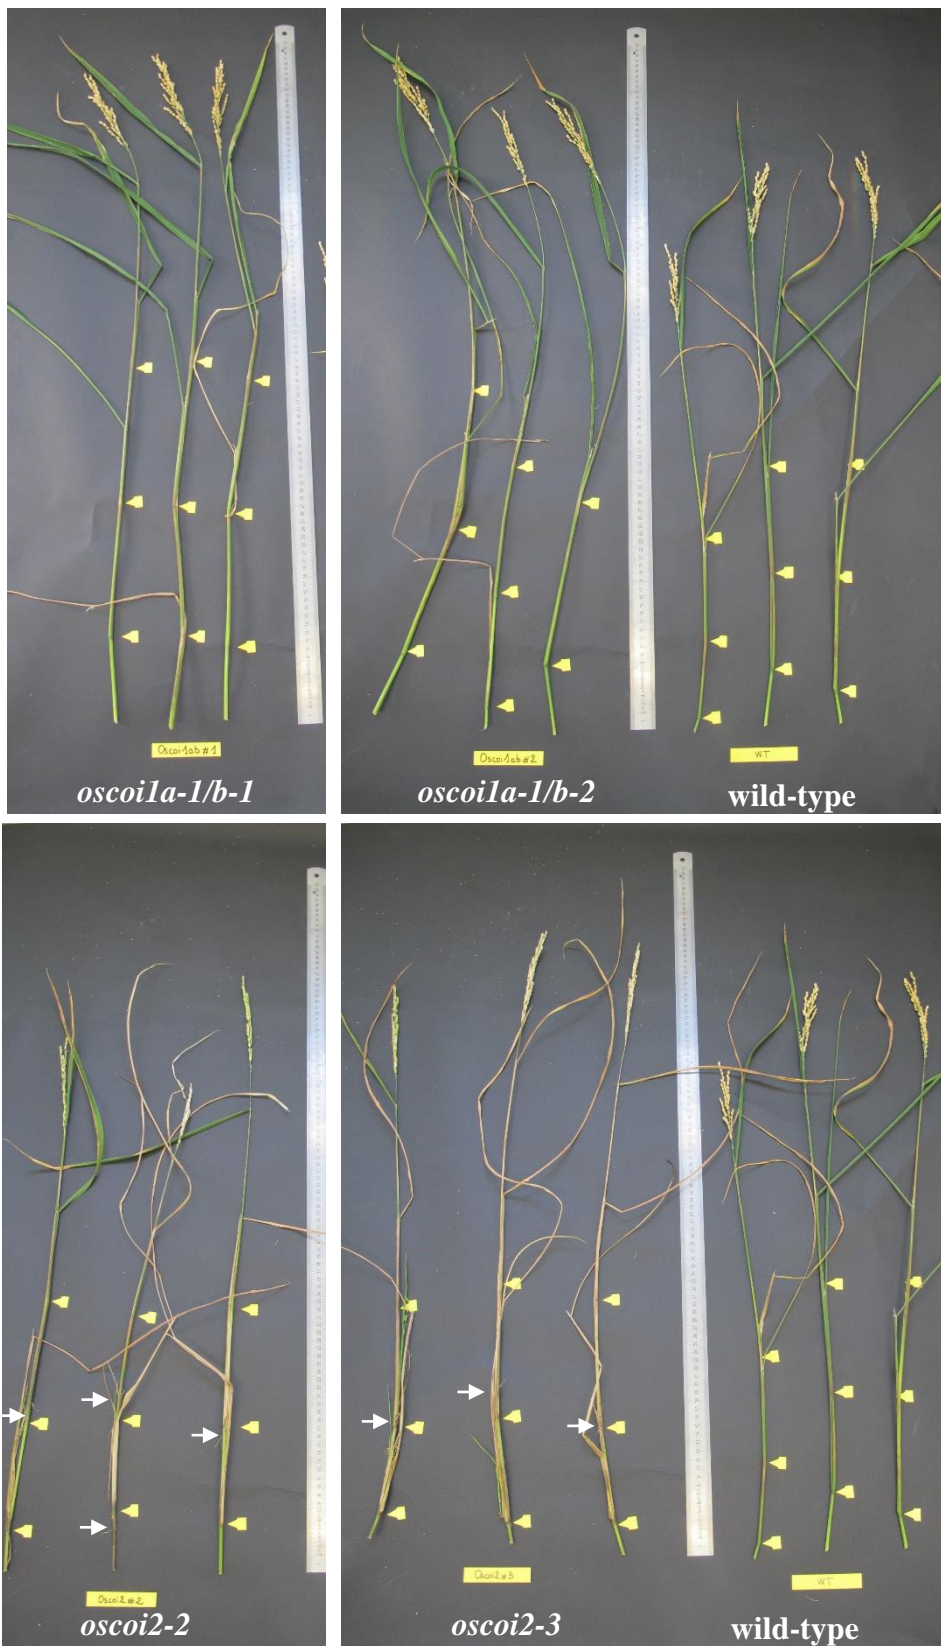

**Figure S2. Images of wild type, *oscoi1a-1/b-1*, *oscoi1a-1/b-2*, *oscoi2-2* and *oscoi2-3* show panicle phenotypes.**  
 Yellow arrows show nodes 1, 2 and 3. White arrows indicate adventitious roots from nodes.

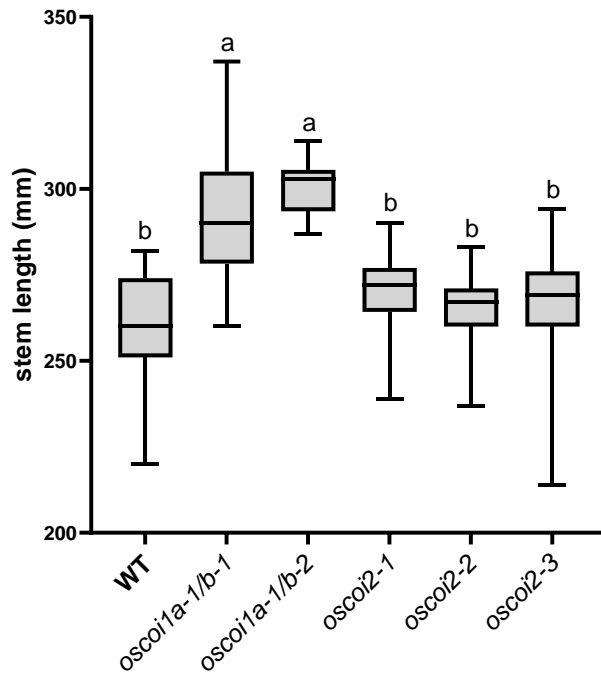

**Figure S3. Quantification of stem length of the WT and *oscoi* mutant plantlets.**

Quantification of stem length of the WT and *oscoi* mutants plantlets. Letters indicate significant differences between lines (21 < n < 24, One way-ANOVA with Tuckey's multiple comparisons test,  $p < 0.05$ ). In the boxplots, whiskers denote minimum/maximum values, the box defines the interquartile range and the centre line represents the median.

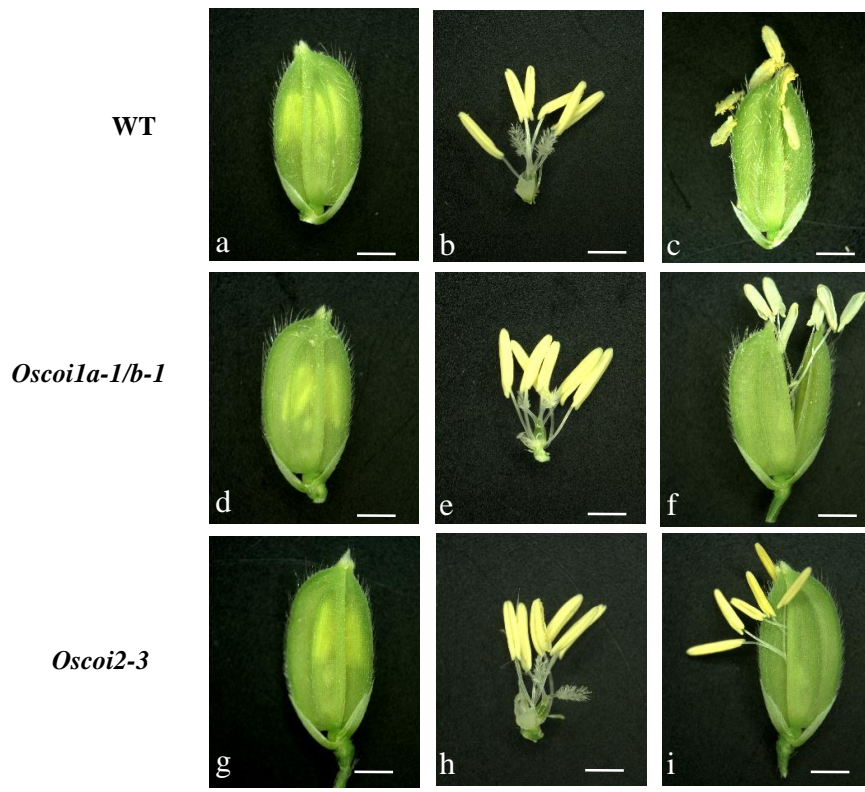

**Figure S4. Comparison of anther dehiscence between the wild-type and the *oscoi* mutants.**

Close spikelet before anthesis (a, b, d, e, g and h) and after widely opened spikelet (c, f, i).

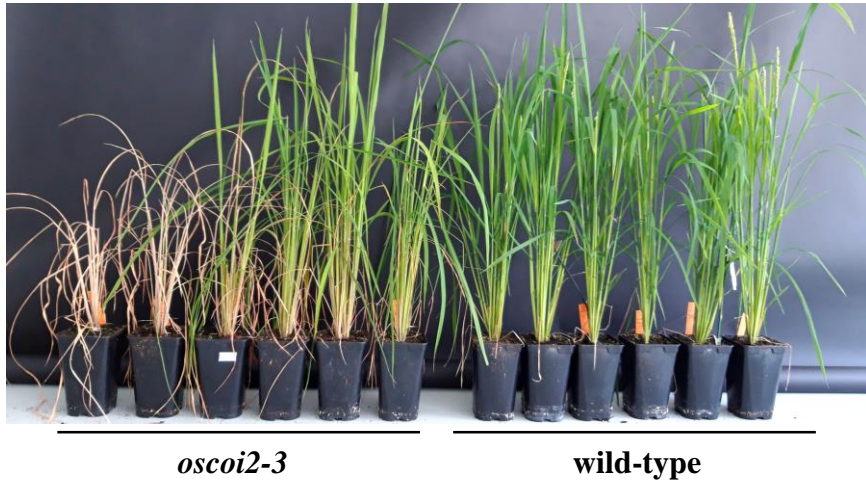

**Figure S5. Image of wild-type and *oscoi2-3* mutant plants showing mortality at reproductive stage.**

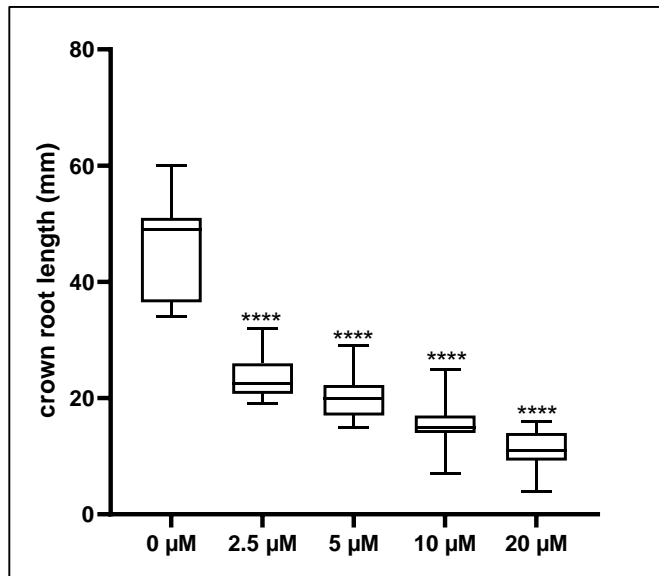

**Figure S6. JA dose-dependent effect on crown root length**

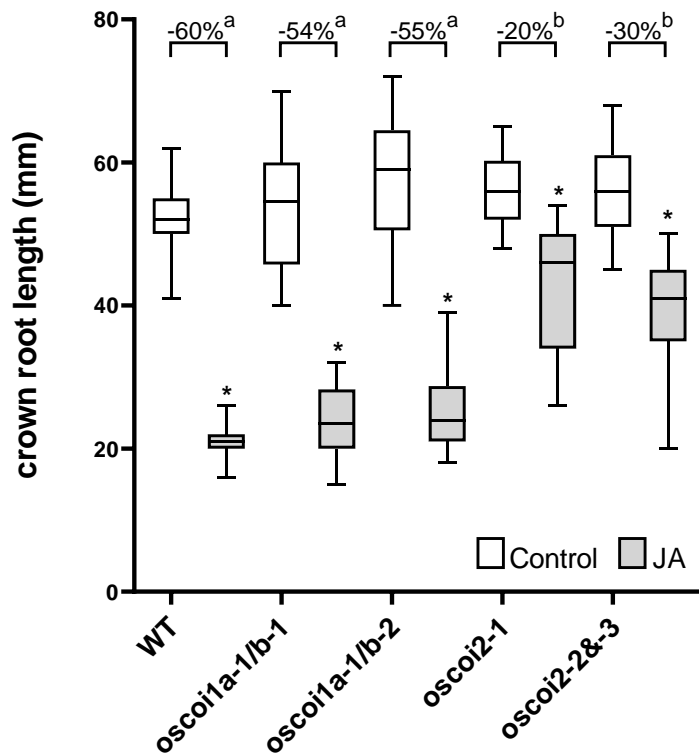

**Figure S7. Crown root growth inhibition assay by JA application on WT and T2 *oscoi* mutants.** Effect of JA on crown root length of the WT, two allelic mutations of the double mutant *oscoi1a/oscoi1b* (*oscoi1a-1/b-1* and *oscoi1a-1/b-2*) and two mutants of *OsCOI2* (*oscoi2-1*, *oscoi2-2&-3* heterozygous line). In the boxplots, whiskers denote minimum/maximum values, the box defines the interquartile range and the center line represents the median. Asterisks indicate significant differences between treated and control plants (One way-ANOVA with Bonferroni's multiple comparisons test,  $p < 0.05$ ). The plot values are the means of the crown roots. Percentage of crown root growth inhibition by JA from the WT, *oscoi1a-1/b-1*, *oscoi1a-1/b-2*, *oscoi2-1* and *oscoi2-2&-3* heterozygous line. Letters (a, b) indicate significant differences between lines (One way-ANOVA with Tuckey's multiple comparisons test,  $p < 0.05$ )

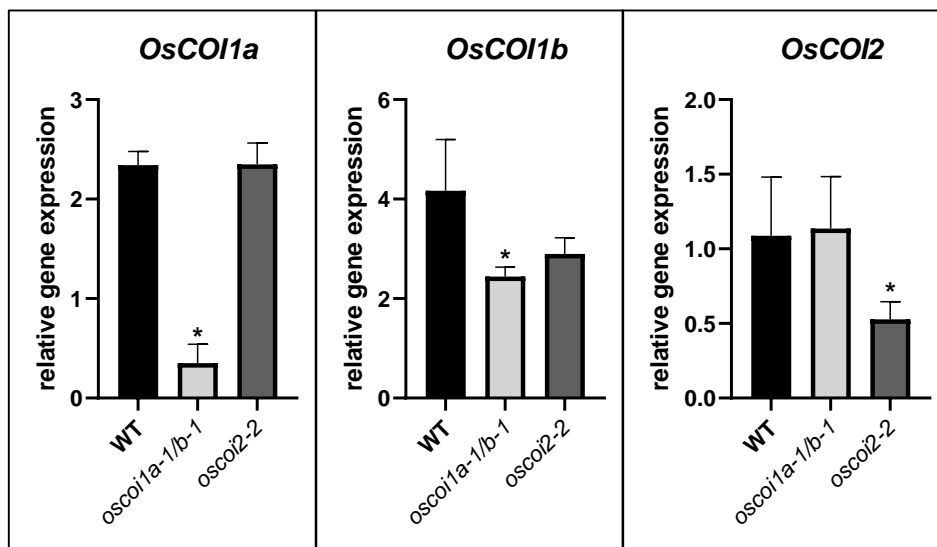

**Figure S8.** Relative expression of *OsCOI* genes in WT and *oscoi* mutants in crown root tips



| Gene name       | Locus or Target | Forward primer             | Reverse primer         | Amplicon size | Use                   |
|-----------------|-----------------|----------------------------|------------------------|---------------|-----------------------|
| <i>OsCOI1a</i>  | LOC_Os01g63420  | GATGCCCTCCCTGAGATACA       | CCACACAGGGTTCTCCATCT   | 158 bp        | qPCR                  |
| <i>OsCOI1b</i>  | LOC_Os05g37690  | CAGGCCTTGCTATATTGGA        | CAGGGGAAGGCATACCTCGTA  | 188 bp        | qPCR                  |
| <i>OsCOI2</i>   | LOC_Os03g15880  | ATGGGTGCAAGGATACAAGG       | TGCAAGAATCTGTGCCTGAC   | 133 bp        | qPCR                  |
| <i>OsAOC</i>    | LOC_Os03g32314  | AAGAGGAATCGAGGACAAGATATTTG | AAGCCTCTTCTGTTCGGATCA  | 75 bp         | qPCR                  |
| <i>OsJAZ5</i>   | LOC_Os04g32480  | CGAGGCAACTAAAGCAAAAGGA     | TGAGTGGCTCTTTGGCAAAATT | 71 bp         | qPCR                  |
| <i>OsJAZ8</i>   | LOC_Os09g26780  | GAAGGCTCAACAGCTGACCAT      | TTGGTGGACGGGAAGTTCTC   | 69 bp         | qPCR                  |
| <i>OsMYC2</i>   | LOC_Os10g42430  | CTAGCGAGGAAACCAATCG        | CCATCCATCCATCCTAACAC   | 158 bp        | qPCR                  |
| <i>OsWRKY71</i> | LOC_Os02g08440  | CGGCAAAAGACGCTTGTAAAC      | TCGGGACCGAAGCAAATTTG   | 106 bp        | qPCR                  |
| <i>OsPR5</i>    | LOC_Os12g43380  | CTGGCGGAGTTCACCATC         | GCAGGAGAAGCTCATGGC     | 87 bp         | qPCR                  |
| <i>OsPR10</i>   | LOC_Os03g18850  | CGGACGCTTACAACATAATCG      | AAACAAAACCATCTCCGACAG  | 174 bp        | qPCR                  |
| <i>OsPLT1</i>   | LOC_Os04g55970  | AACATTCGGCACTGAGGAGG       | CTCCCGATTGGAAGTTGCT    | 141 pb        | qPCR                  |
| <i>OsPLT6</i>   | LOC_Os11g19060  | TCCAGACGTCACAGGTTTCG       | CGGGAGACCATGAAAGCCAT   | 94 pb         | qPCR                  |
| <i>OsEXPB7</i>  | LOC_Os03g01270  | GTCAGTATCCAGGGCTGACG       | CGTACTCCACAGTATCGCC    | 81 bp         | qPCR                  |
| <i>OsEXP13</i>  | LOC_Os02g16730  | CAAGTGAGCCACCTGATCGAT      | ACCCCCATCAGCATCCAAATT  | 153 pb        | qPCR                  |
| <i>OsXTH12</i>  | LOC_Os06g48180  | AGTGCACTGCCAAGTAGGAAA      | TCTTCCTCGTATCCTTTTCCCA | 133 pb        | qPCR                  |
| <i>OsCYCB1</i>  | LOC_Os01g59120  | CTCTCAAGCACCACTGGA         | CTTGCTCTCAGGGGCGTAG    | 92 pb         | qPCR                  |
| <i>OsCDKB1</i>  | LOC_Os01g67160  | GTCCGTTGGTTGCATCTTCG       | GTTACTCCAGGCCACTGCTC   | 132 pb        | qPCR                  |
| <i>OsCDKB2</i>  | LOC_Os08g40170  | CGCTCGTTCACTGTCCCTCT       | CCACAGACCAGATGTCAACCG  | 121 pb        | qPCR                  |
| <i>EXP</i>      | LOC_Os06g11070  | TCCATCTGCTCCCGTTGTTGTG     | AAAGAGTTCGCCACCAACCGTC | 273 bp        | qPCR                  |
| <i>OsCOI1a</i>  | target 1        | TGGAAGAGTGCCATATTACTG      | TCAAACACAATTAATCAATGC  | 496 bp        | identify mutations    |
| <i>OsCOI1b</i>  | target 2        | TGTCATACTTTAGCTCACTGG      | ACGTAAGTCTTAAGGAGCACA  | 477 bp        | identify mutations    |
| <i>OsCOI2</i>   | targets 1 and 2 | CCATGGCGTACTCCACCACG       | GAGAGAACTCCTAAGACGTAG  | 462 bp        | identify mutations    |
| <i>OsCOI2</i>   | targets 3 and 4 | CCATATGTTGTCAATTTGCAG      | CAGCGCTGGACCAGCTGACAG  | 485 bp        | identify mutations    |
| <i>Cas9</i>     | T-DNA           | GGATGATGGCATATGCAGCAG      | GAGTGTGAGGTCCTGTTGGT   | 1216 bp       | check T-DNA insertion |
| <i>HPT</i>      | T-DNA           | CTCGGAGGGCGAAGAATCTC       | GCTCCAGTCAATGACCGCTG   | 759 bp        | check T-DNA insertion |

**Table S1. List of primers used for qPCR and plant genotyping.**
